# Supplementary material
Source: PubMed Central journal article supplement (PMC2708876)
Supplement: supp_M109.002881_jbc.M109.002881-4.pdf [file supp_M109.002881_jbc.M109.002881-4.pdf]

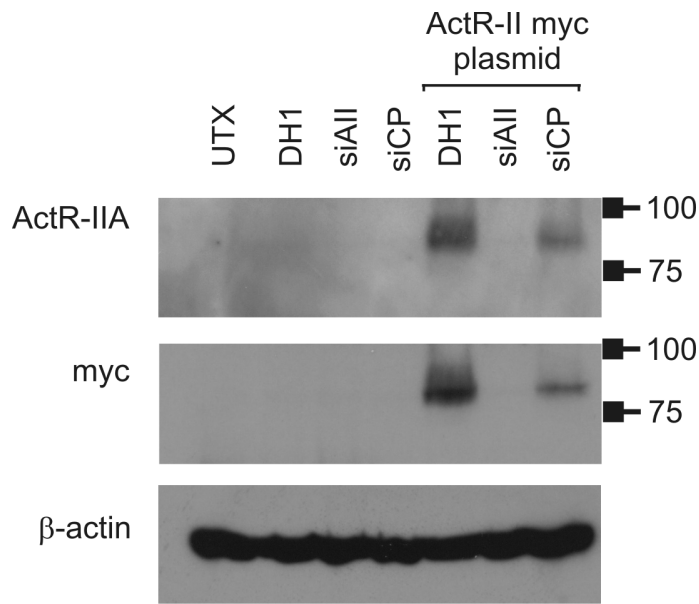

**Supplement Figure 4: siActR-II reduces plasmid-overexpressed ActR-IIA protein in HeLa Cells.** HeLa cells were transfected in 6-well plates with siActR-II or siCP (10nM each) using Lipofectamine (4.6  $\mu$ l/well). Cells were transfected with siRNA alone, or co-transfected with 0.91 $\mu$ g pcDNA3.1-ActR-II-myc plasmid (from Y. Sidis). After 48h, cells were washed once with PBS and lysed in SDS lysis buffer. Immunoblotting was performed for ActR-IIA and the myc tag. The migration positions of the molecular mass markers (kDa values) are shown. Total RNA was extracted from parallel wells and cDNA prepared. ActR-IIA mRNA expression was reduced by 80% in cells transfected with siRNA alone and by 65% in cells transfected with ActR-IIA-myc, compared to their Lipofectamine controls. Blots are representative of 2 separate experiments.
