# Supplementary material
Source: PubMed Central journal article supplement (PMC2708876)
Supplement: supp_M109.002881_jbc.M109.002881-5.pdf [file supp_M109.002881_jbc.M109.002881-5.pdf]

**A**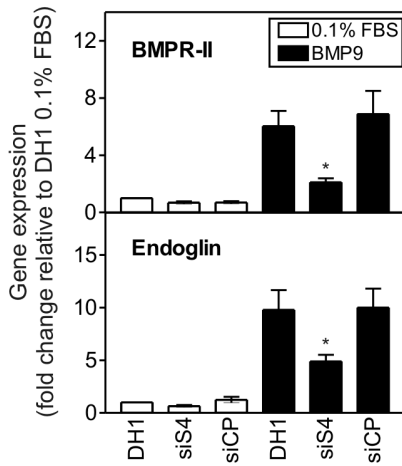**B**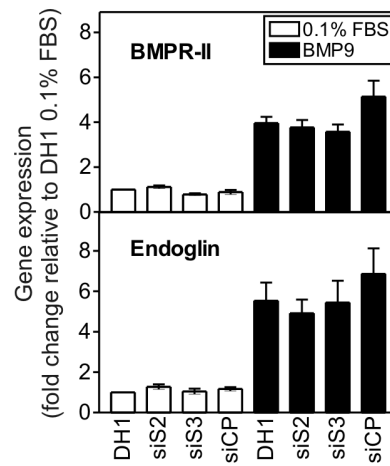

**Supplement Figure 5: BMP9 induces BMPR-II and endoglin expression via a Smad4-dependent pathway in HPAECs.** (A) HPAECs were transfected with siSmad4 or siCP (15nM each) using Dharmafect1 (DH1). After 28h, cells were serum-restricted in M199/0.1% FBS (0.1%) for a further 16h, followed by treatment with BMP9 (1ng/ml) in 0.1% for 8h. Total RNA was extracted and cDNA prepared. The expression of BMPR-II and endoglin were determined using qPCR, with expression being normalized to  $\beta$ -actin and expressed as the fold change relative to 0.1%. Data are presented as the mean  $\pm$  SEM of 5 experiments. \* $P$ <0.05 compared to DH1 plus BMP9 (B) HPAECs were transfected with siSmad2, siSmad3 or siCP (10nM each) using Dharmafect1 (DH1) and treated as described above. Data are presented as the mean  $\pm$  SEM of 4 experiments.
